# Supplementary material for: A molecular insight on the supramolecular assembly of thiophene polymers
Source: Royal Society of Chemistry journal article supplement (doi:10.1039/c2jm30550j), 2012-01-01
Supplement: c2jm30550j.pdf [file c2jm30550j.pdf]

## Supplementary material

# A molecular insight on supramolecular assembly of thiophene polymer.

Chandrasekaran SuryaNarayanan, Ezhakudiyan Ravindran, Soundaram  
Jeevarathinam Ananthakrishnan, Narayanasatri Somanathan and Asit Baran  
Mandal.

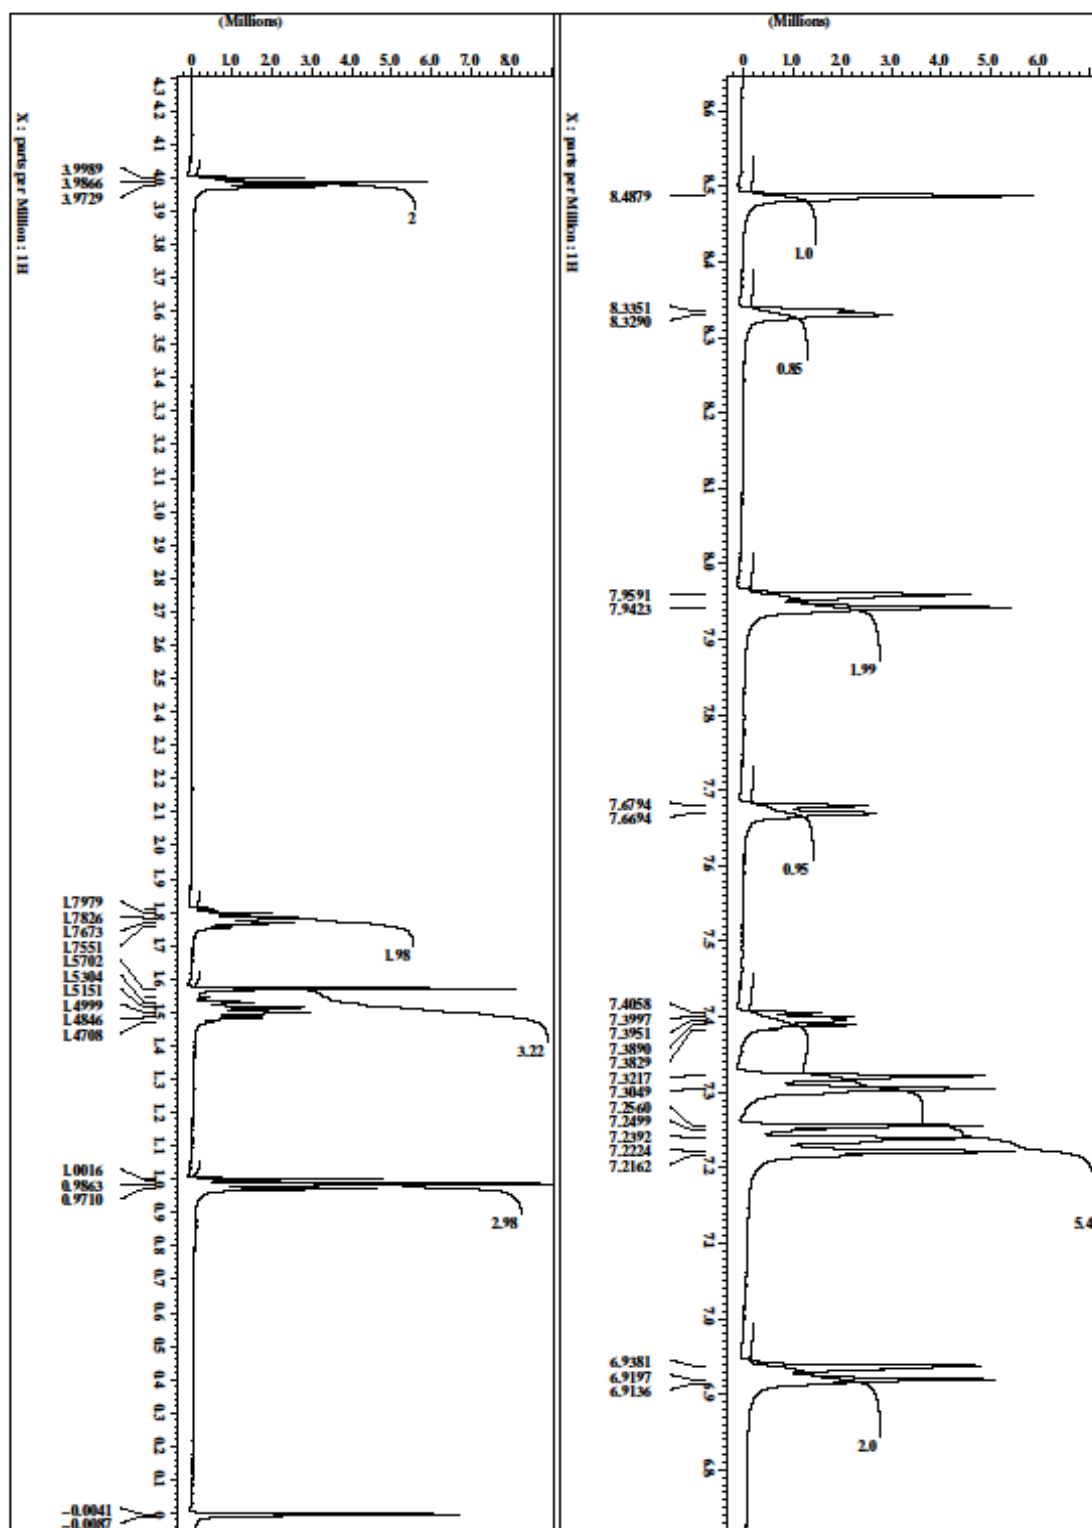

# BPTC $^1\text{H}$ NMR

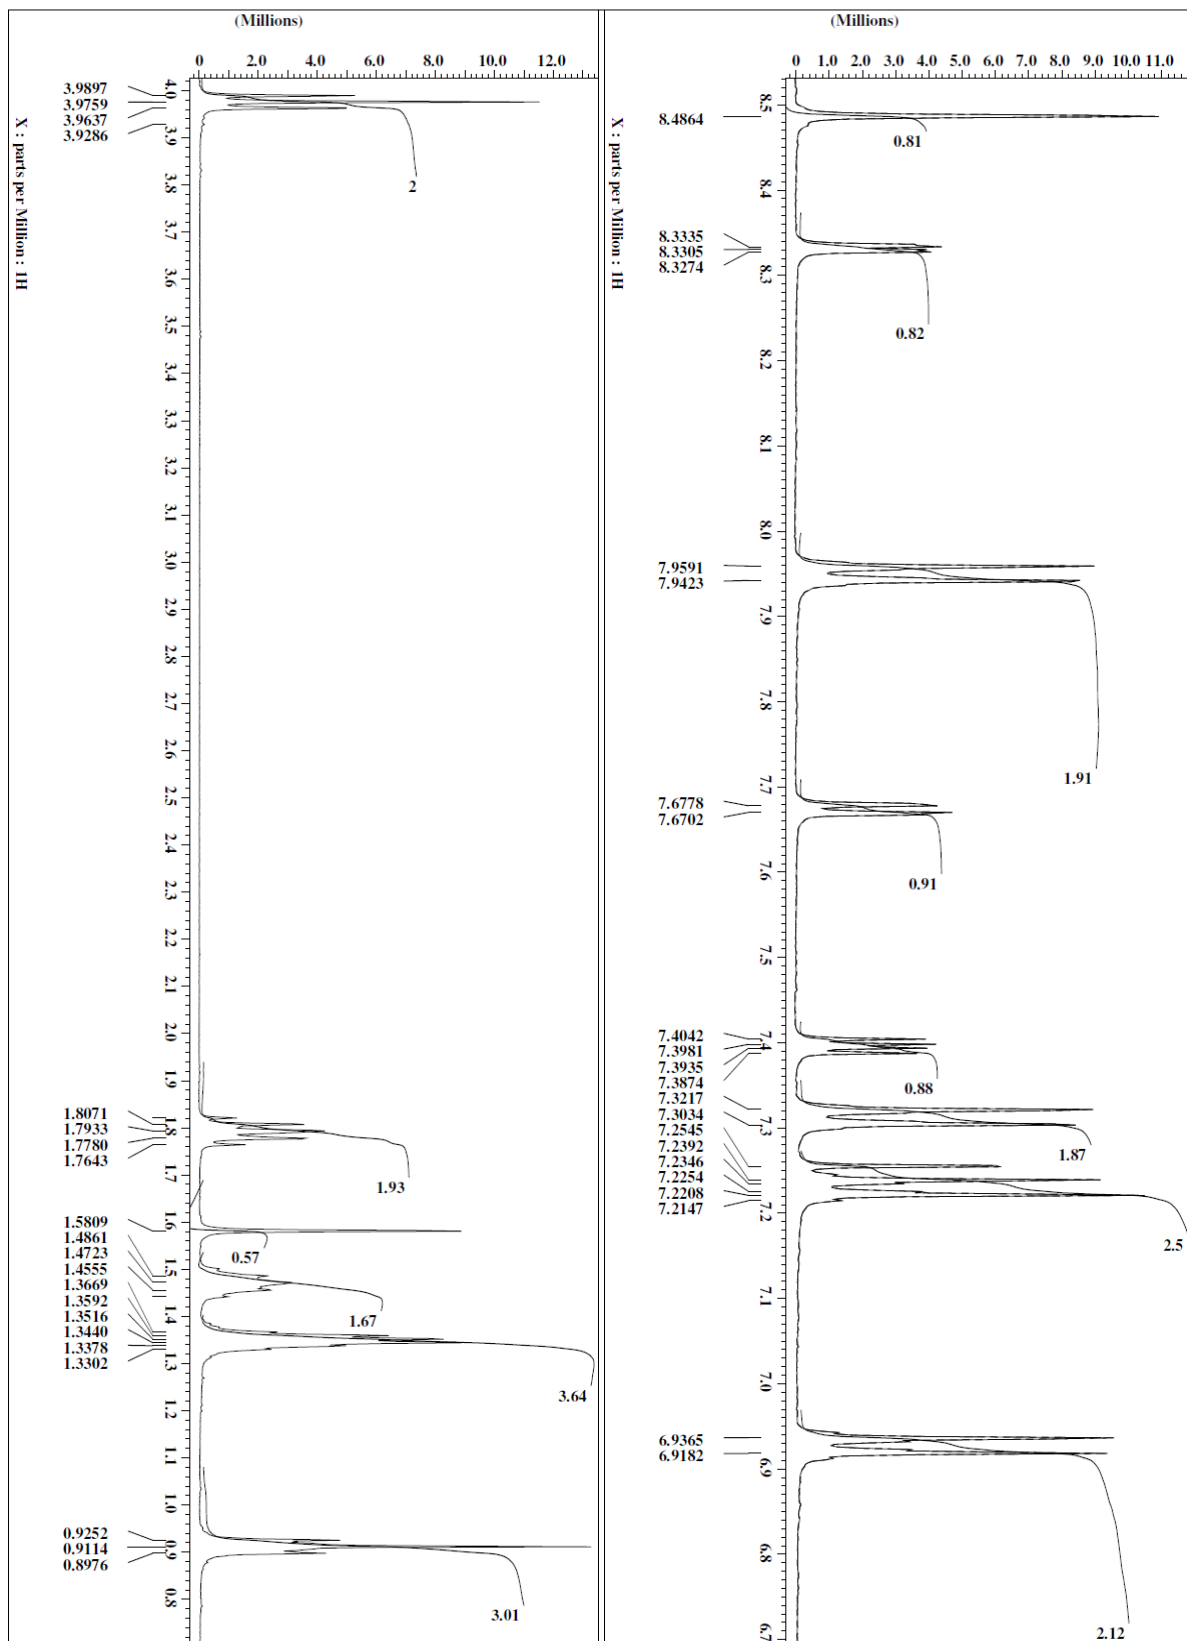

# HPTC $^1\text{H}$ NMR.

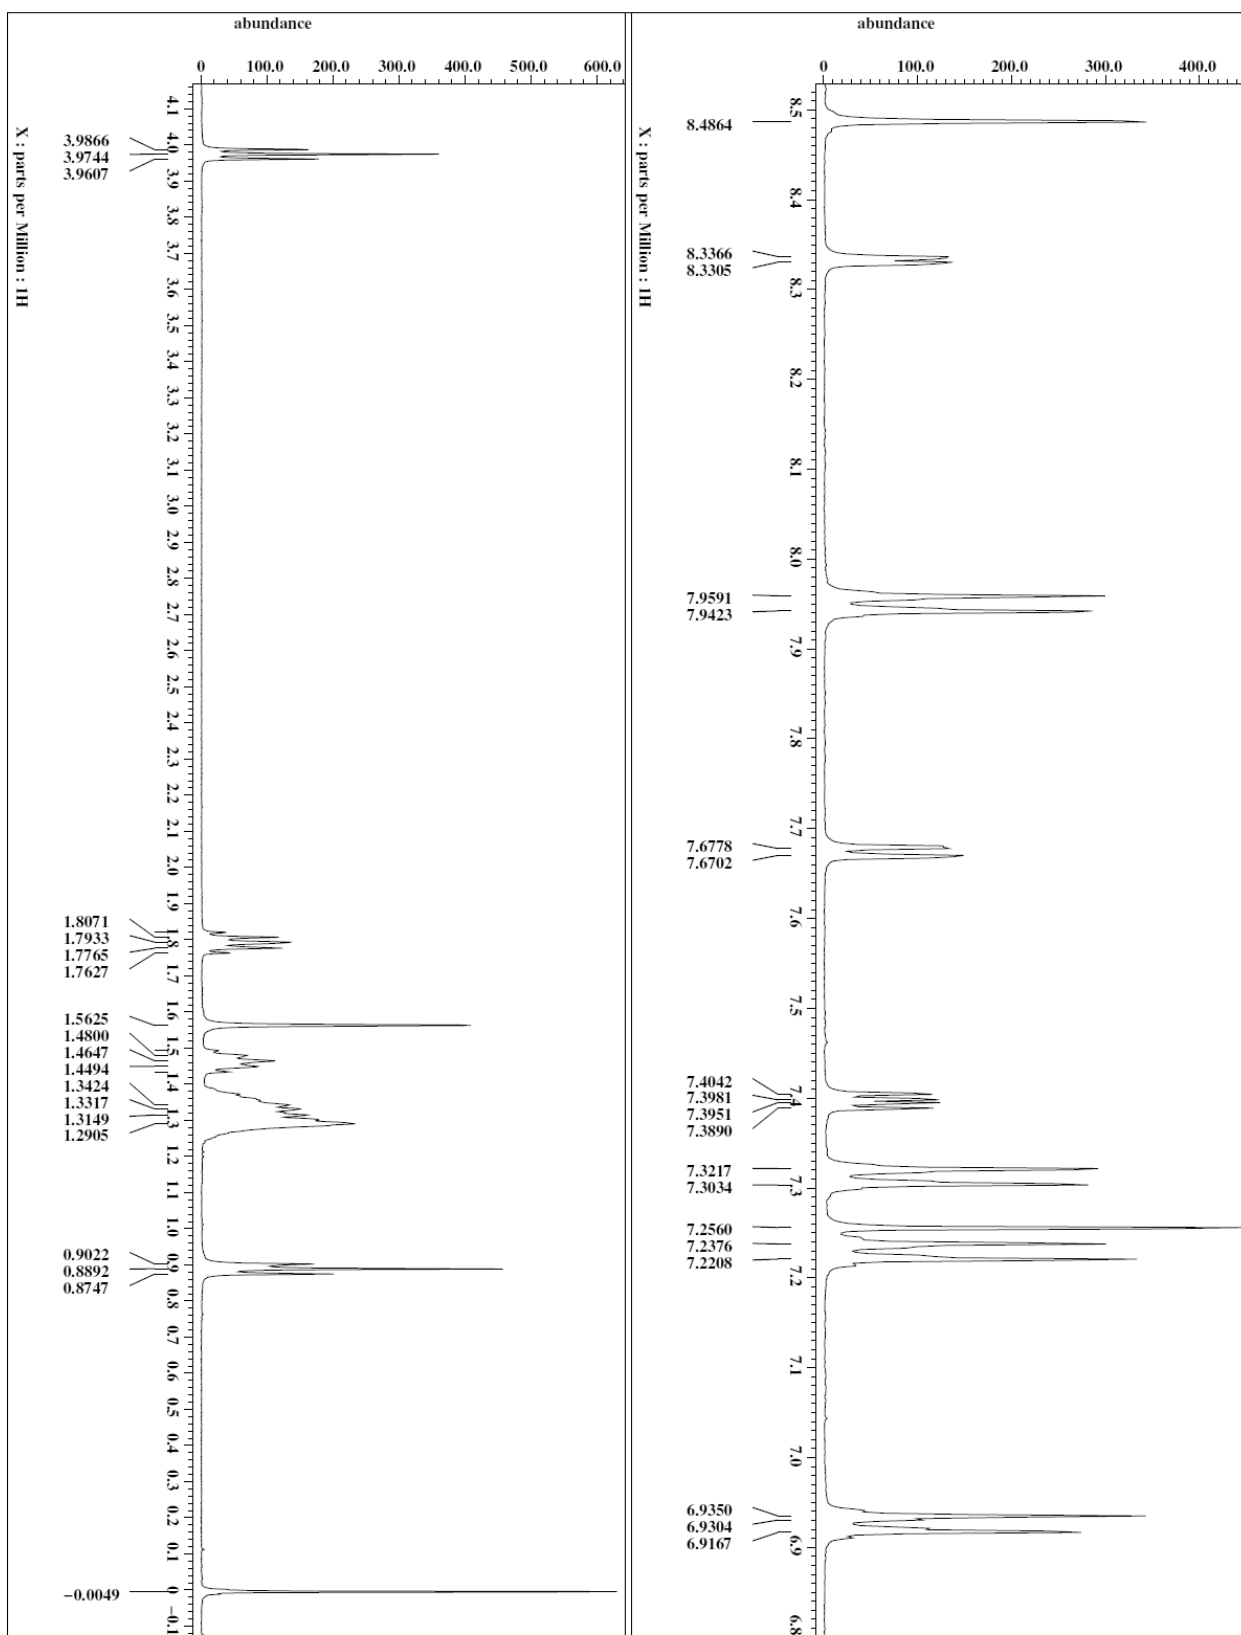

# OPTC $^1\text{H}$ NMR

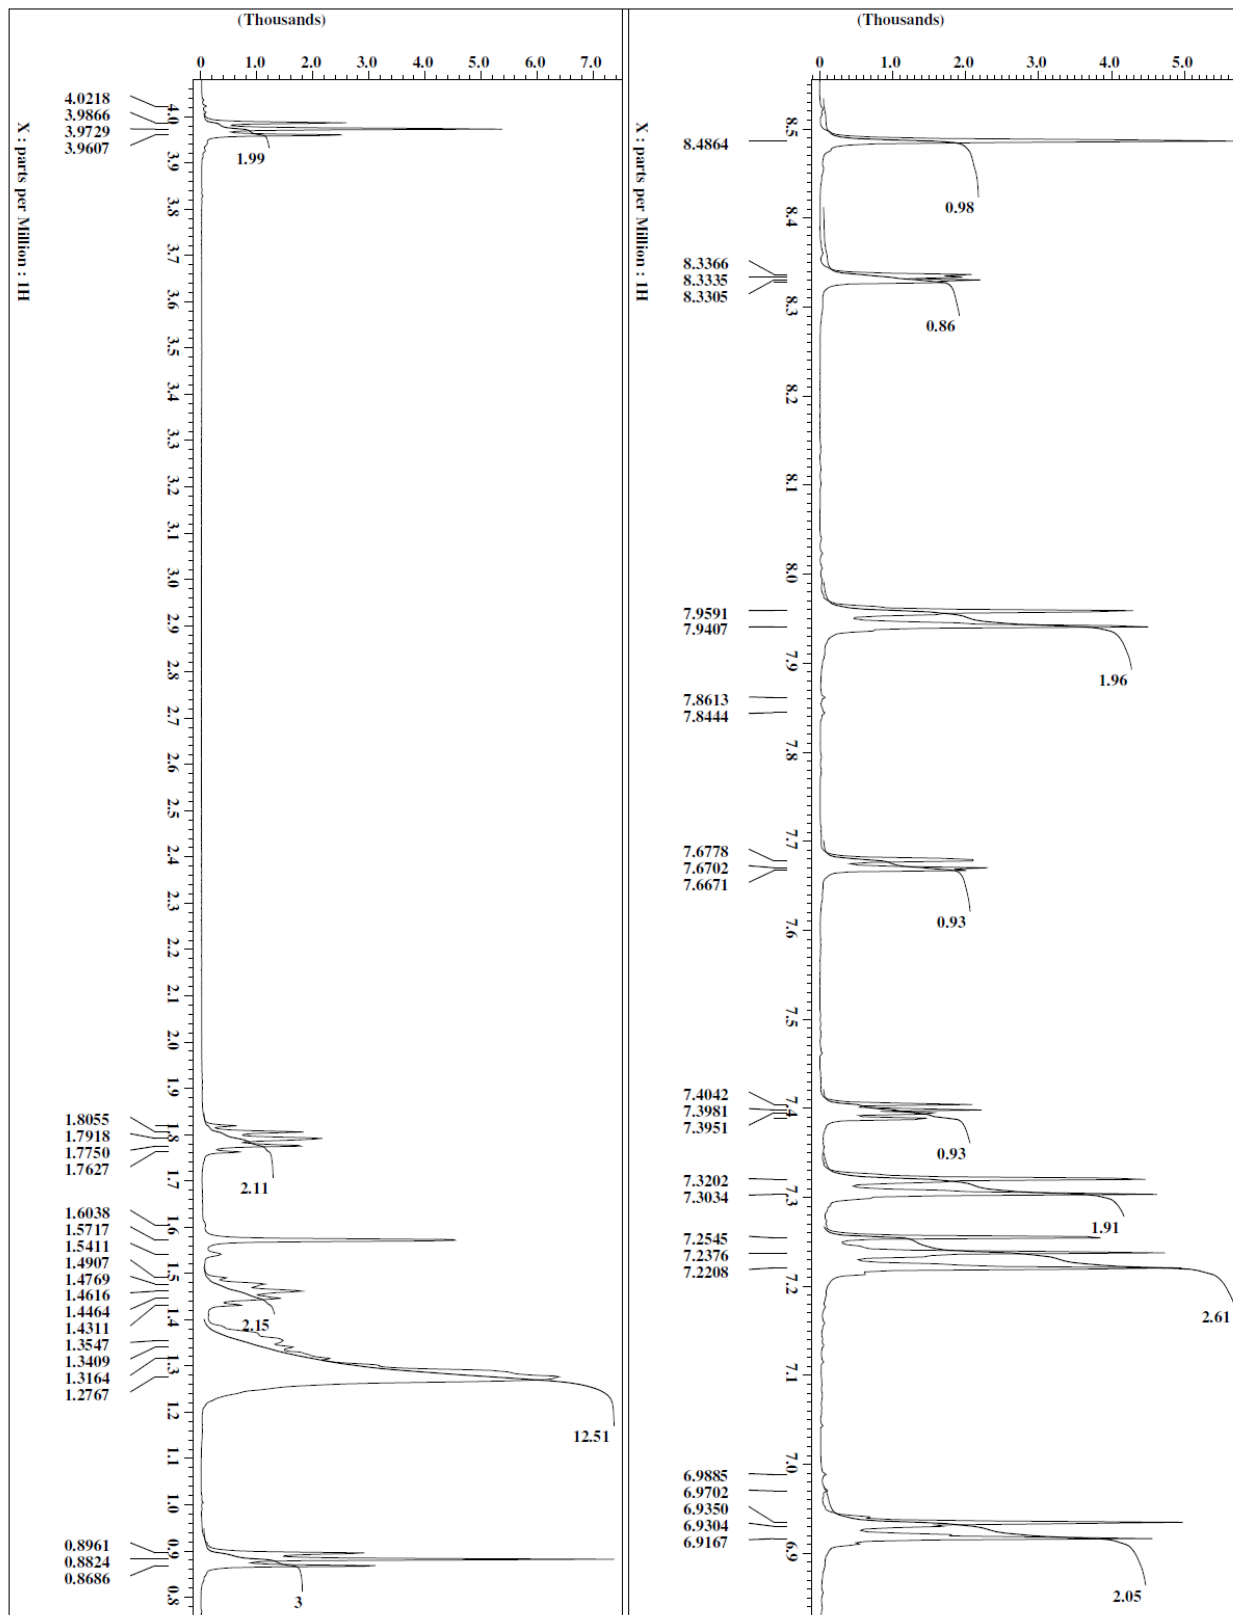

## DPTC $^1\text{H}$ NMR

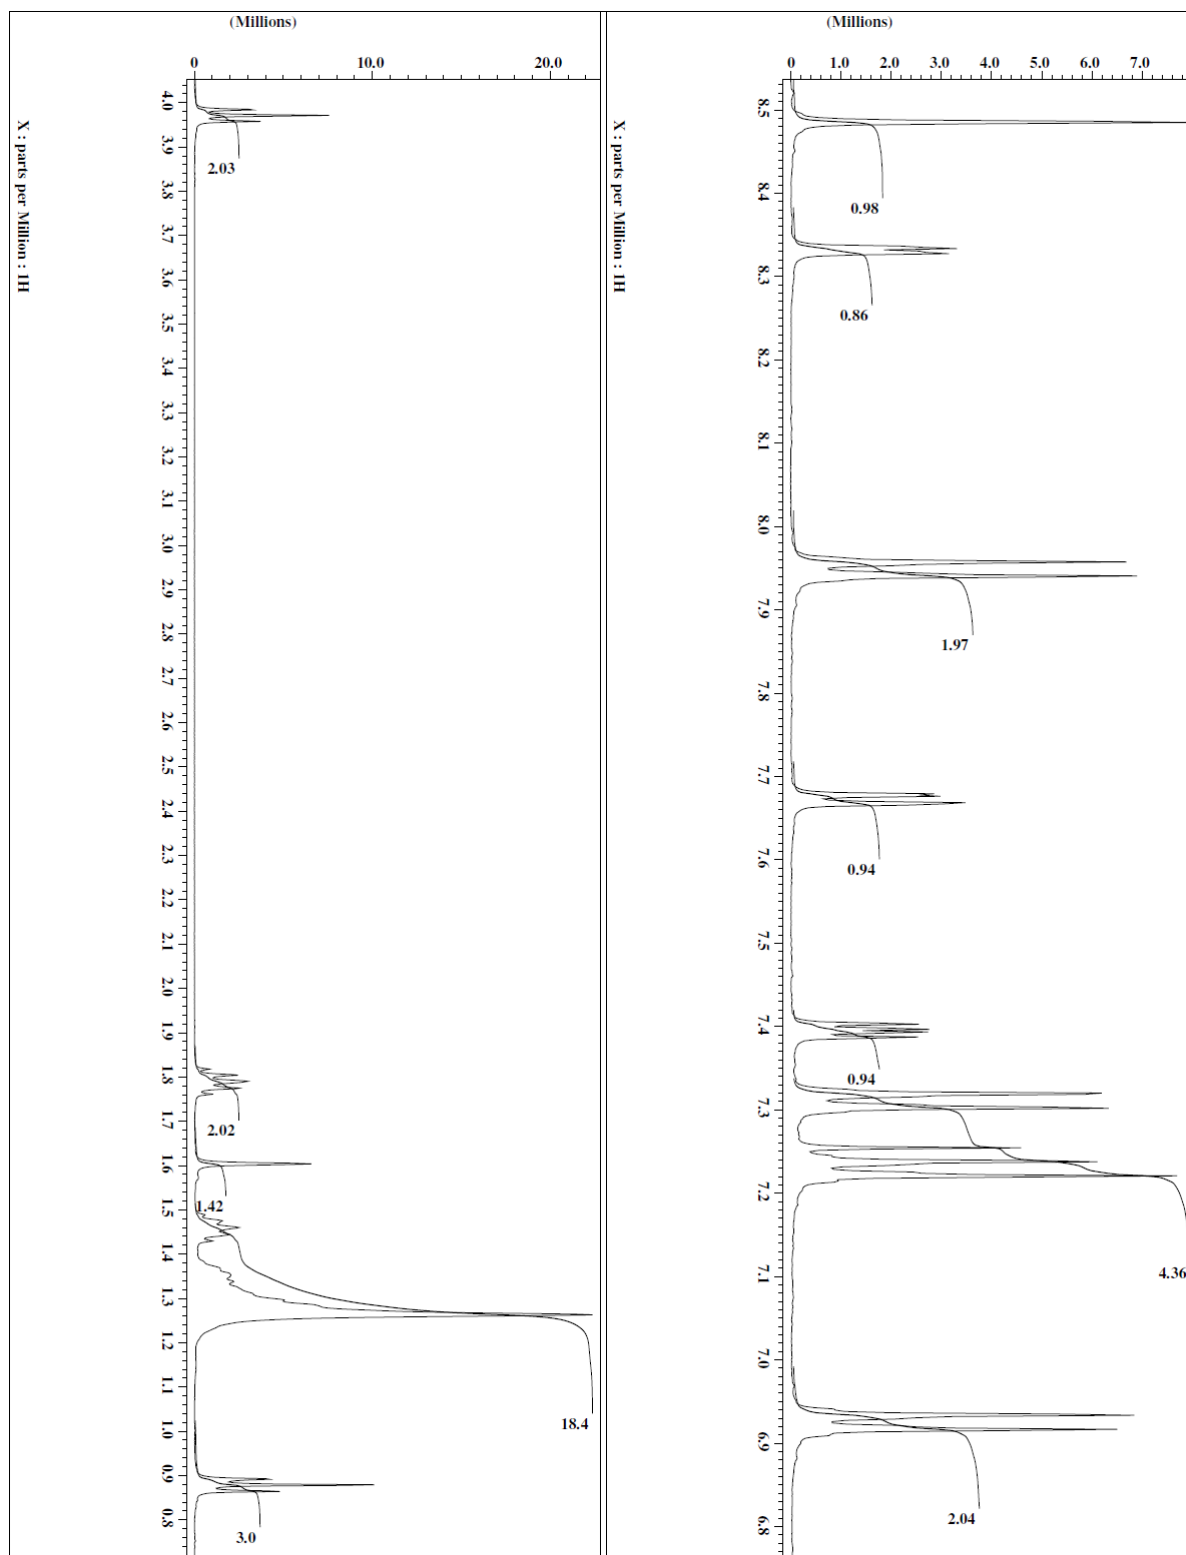

## DDPTC $^1\text{H}$ NMR

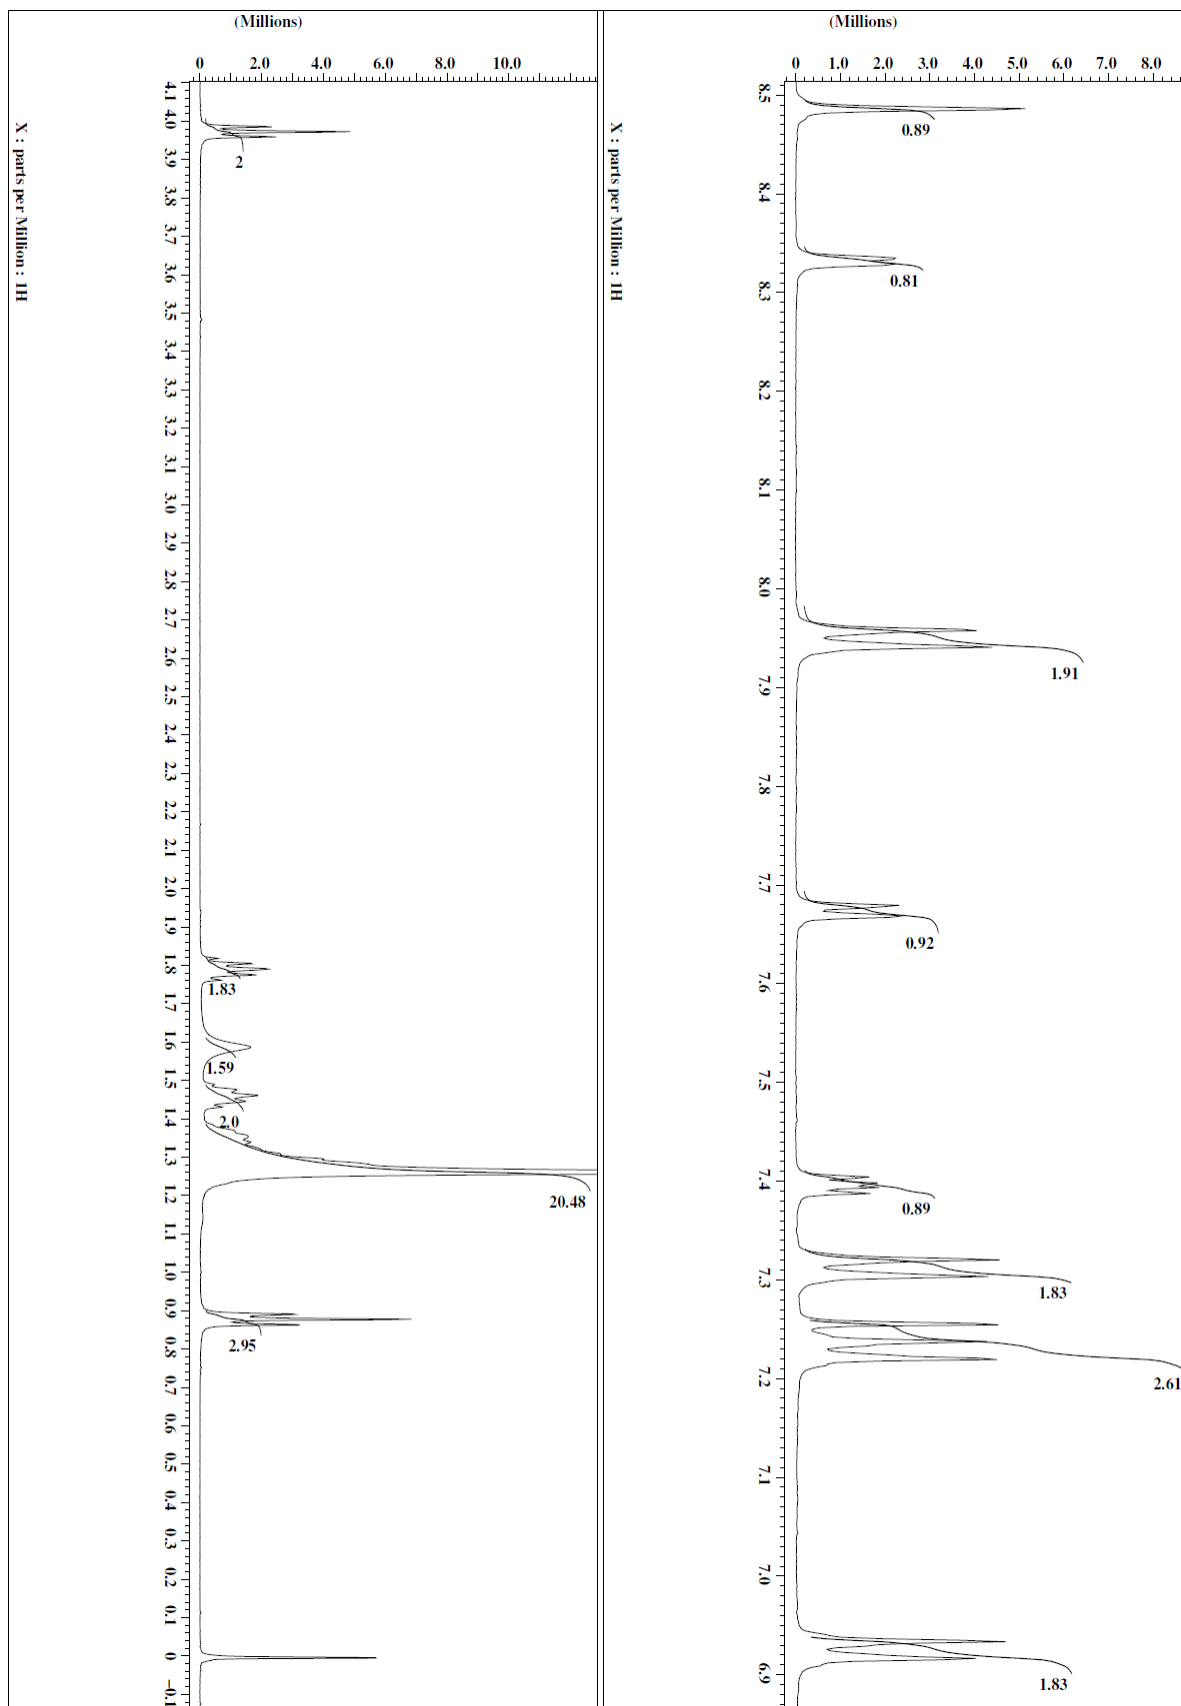

TDPTC  $^1\text{H}$  NMR

# BPTC ESI-MS

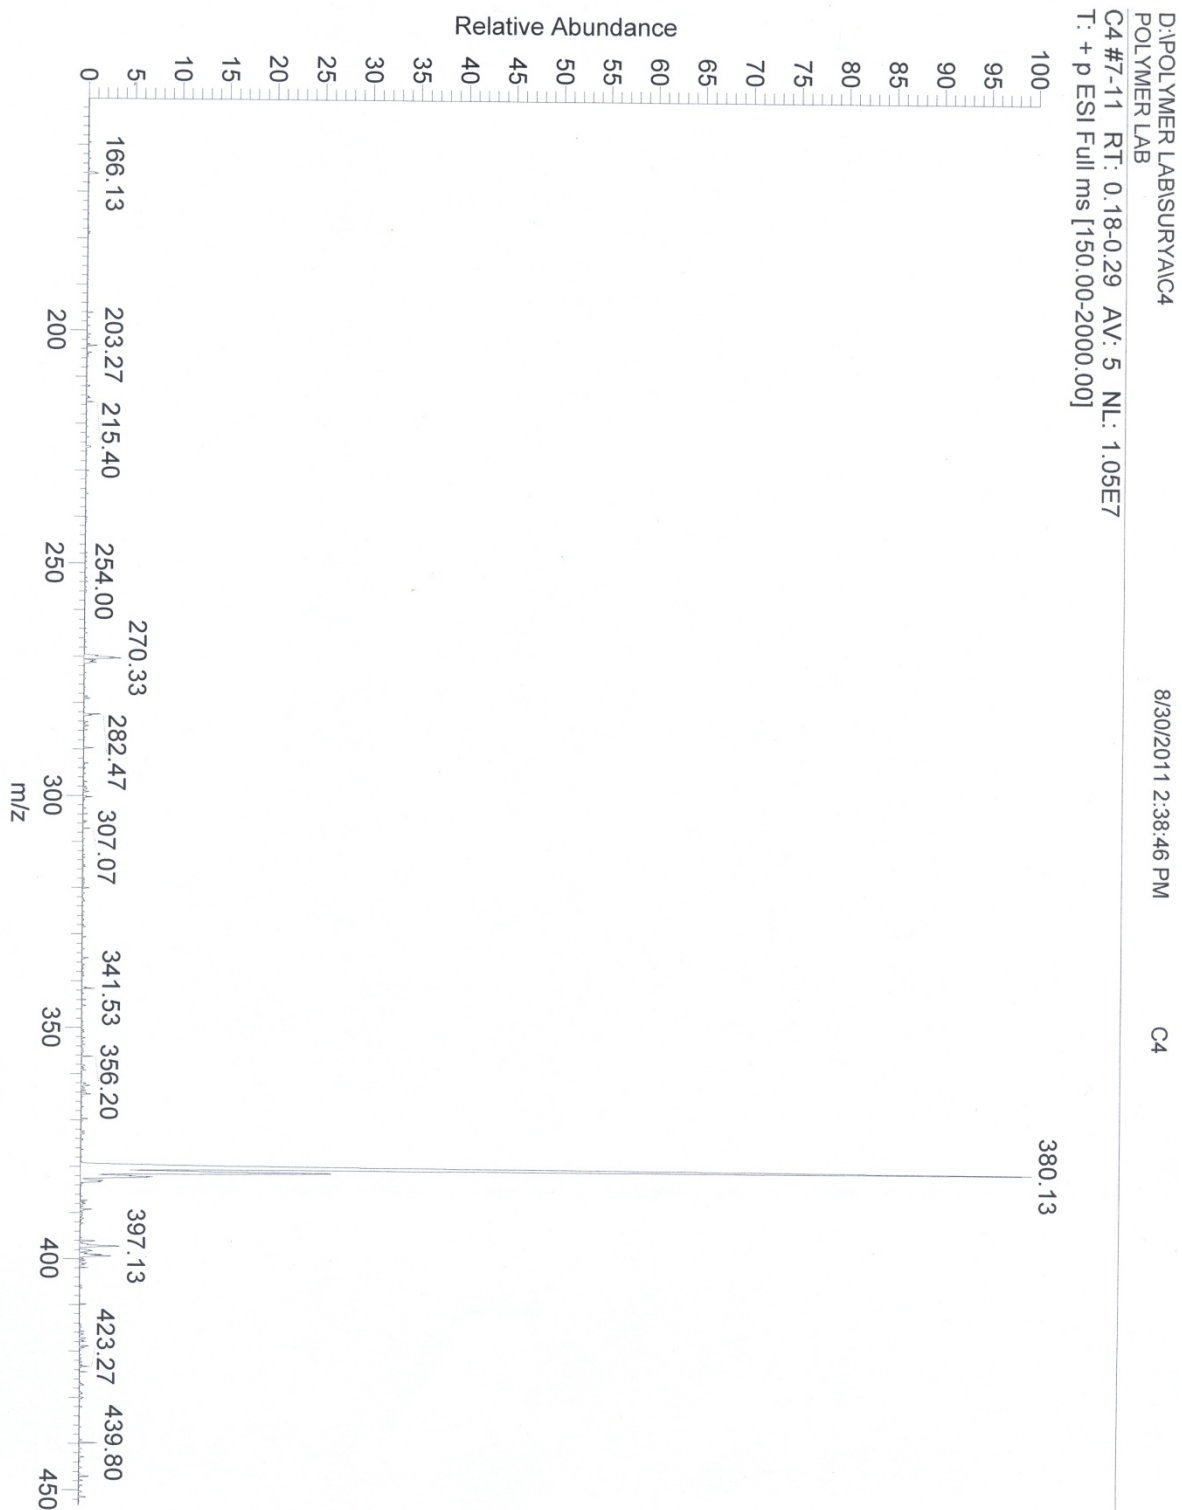



# HPTC ESI-MS

D:\POLYMER LAB\SURYA\C6  
POLYMER LAB

8/30/2011 3:08:19 PM

C6

C6 #12-21 RT: 0.30-0.54 AV: 10 NL: 8.66E6

T: + p ESI Full ms [150.00-2000.00]

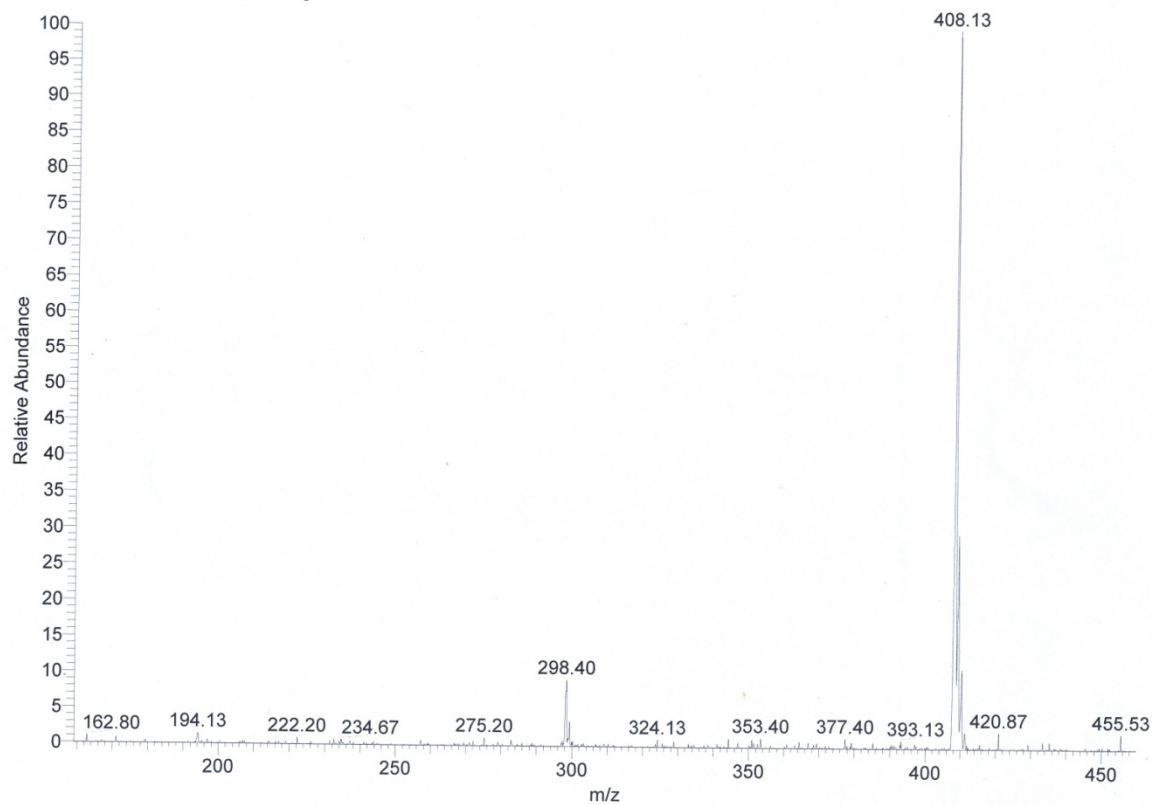

# OPTC ESI-MS

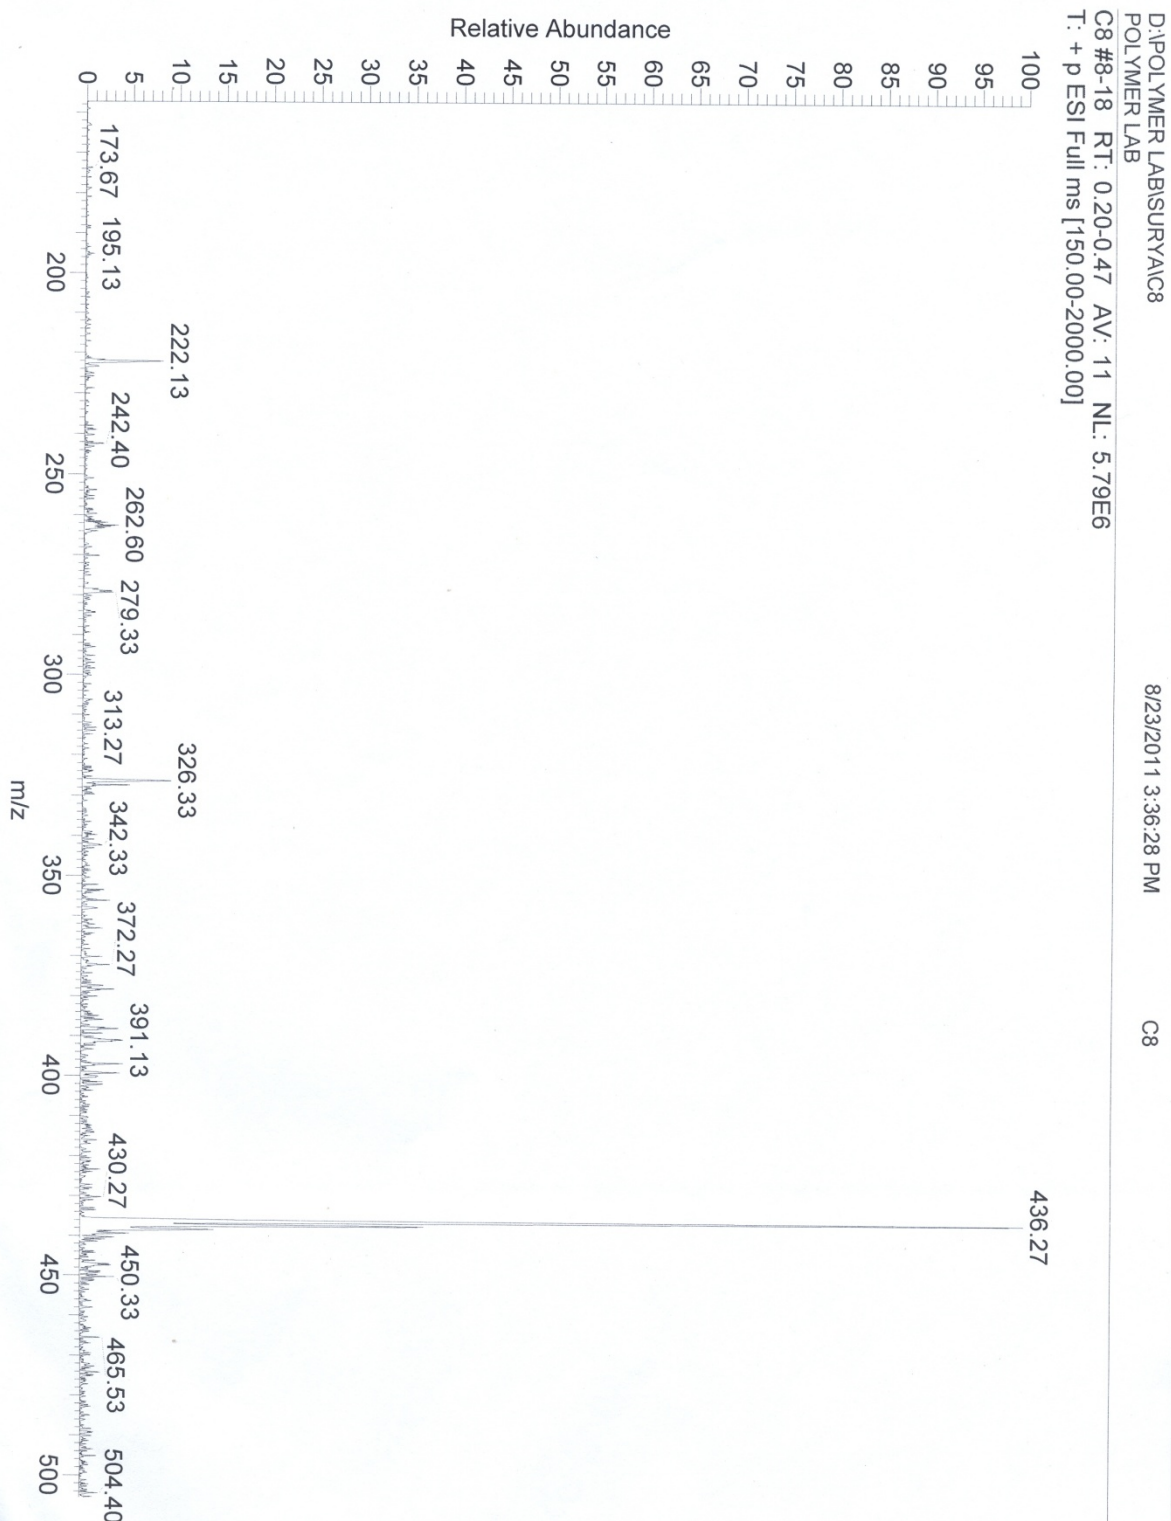

# DPTC ESI-MS

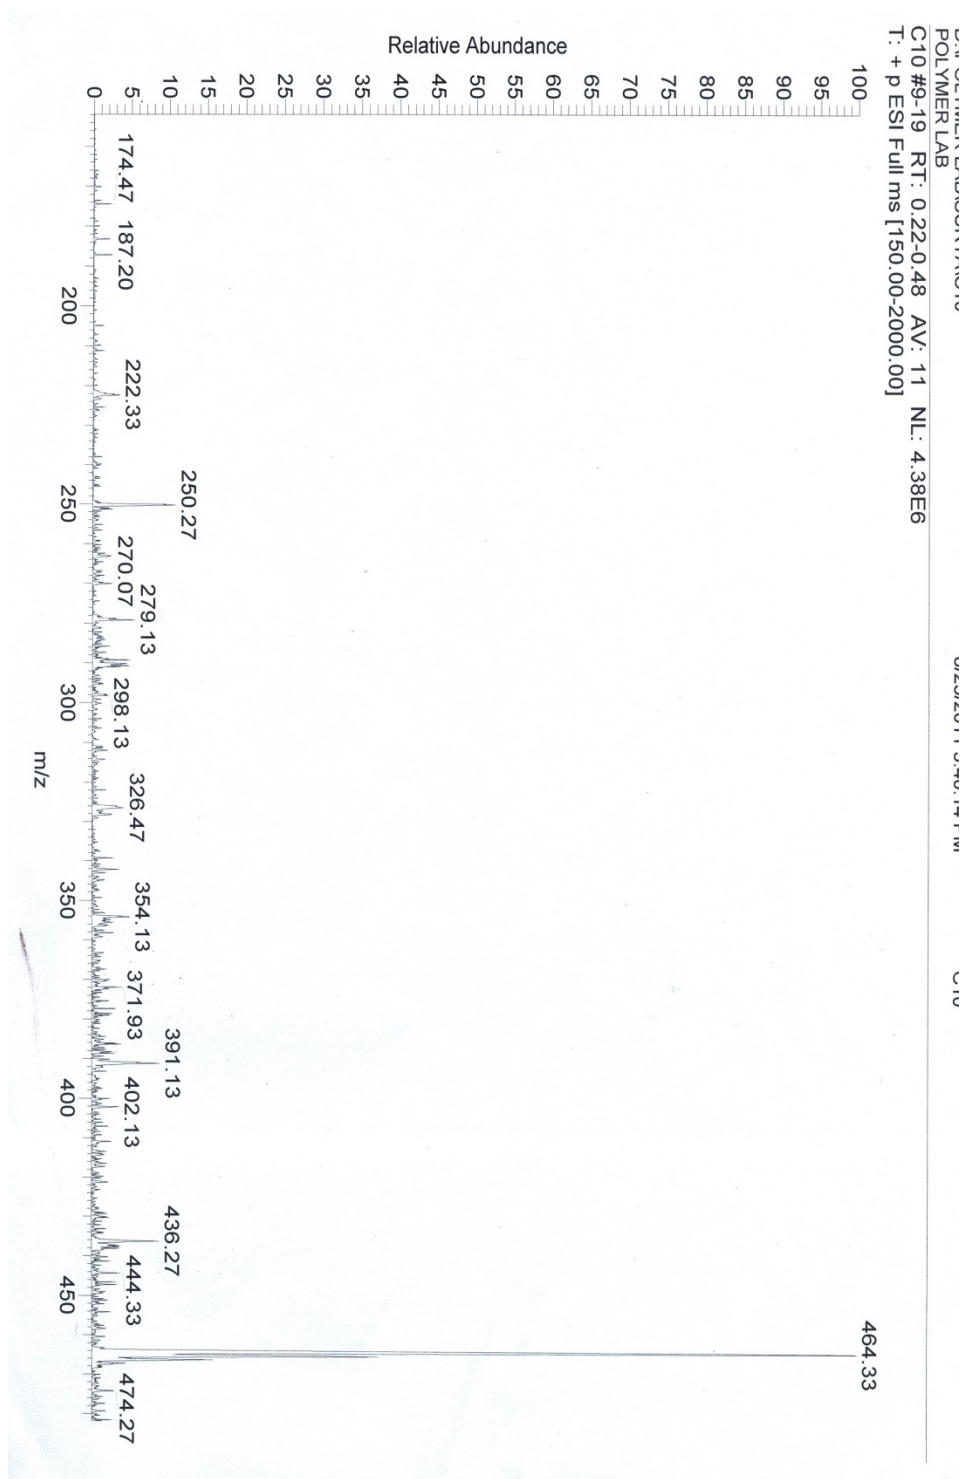

# DDPTC ESI-MS

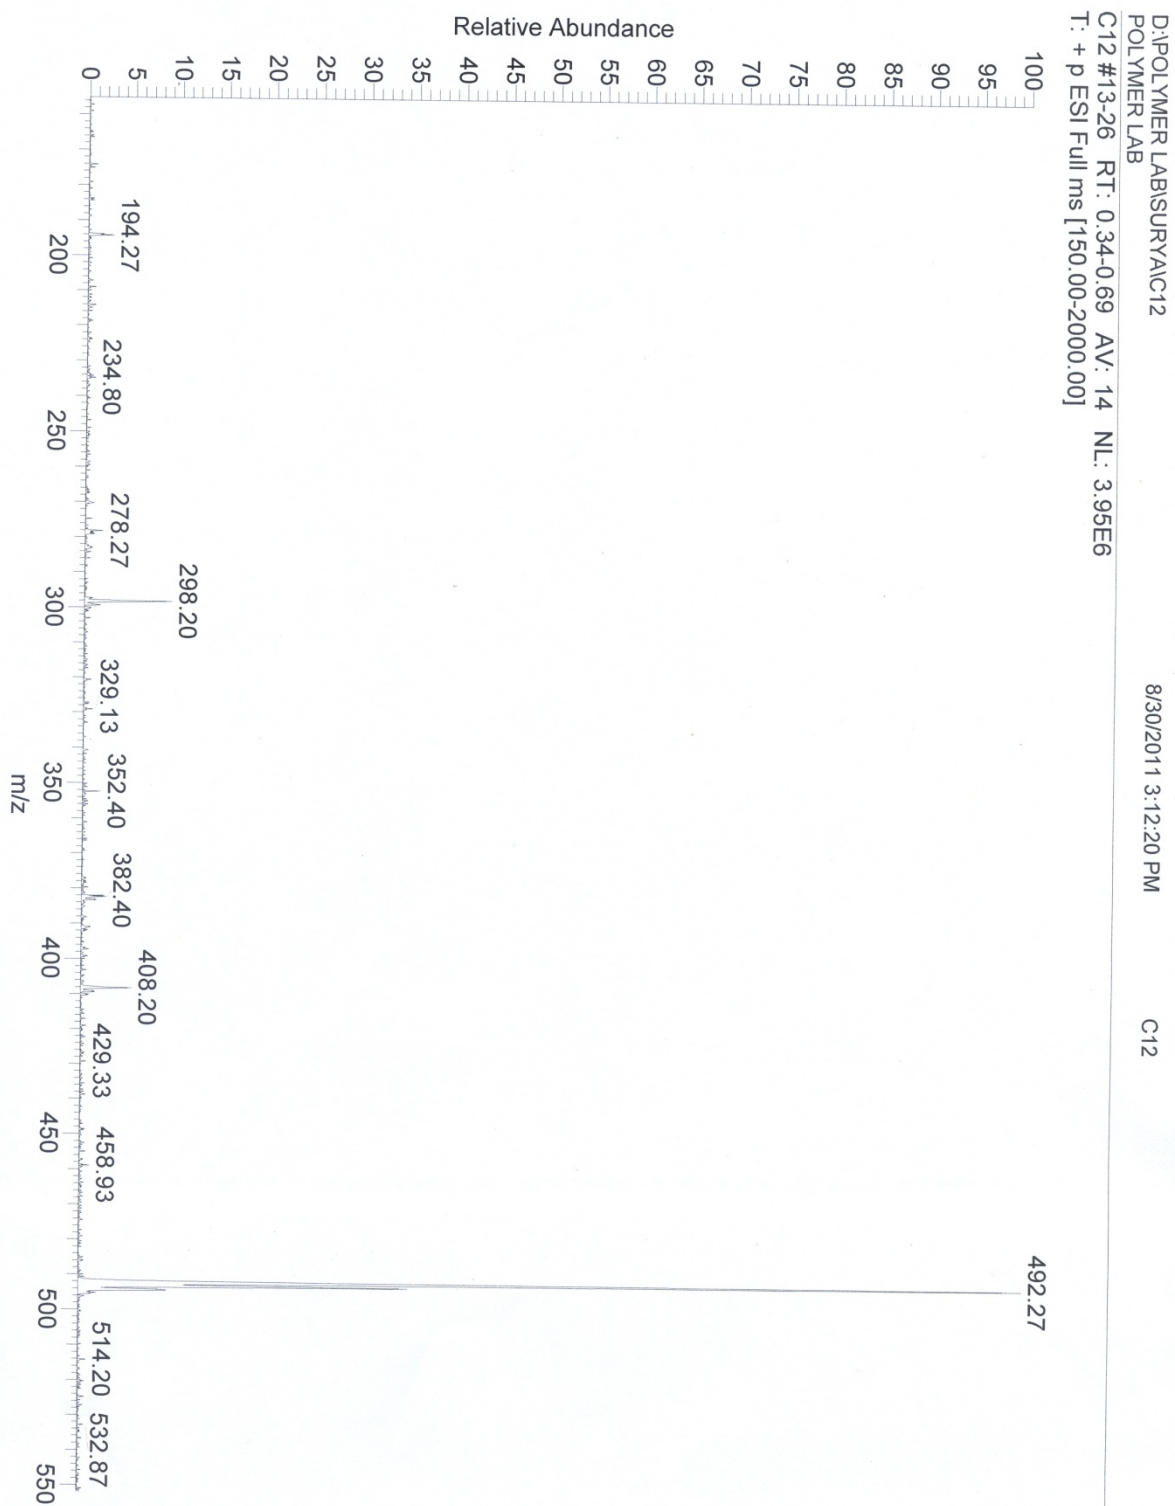

# TDPTC ESI- MS

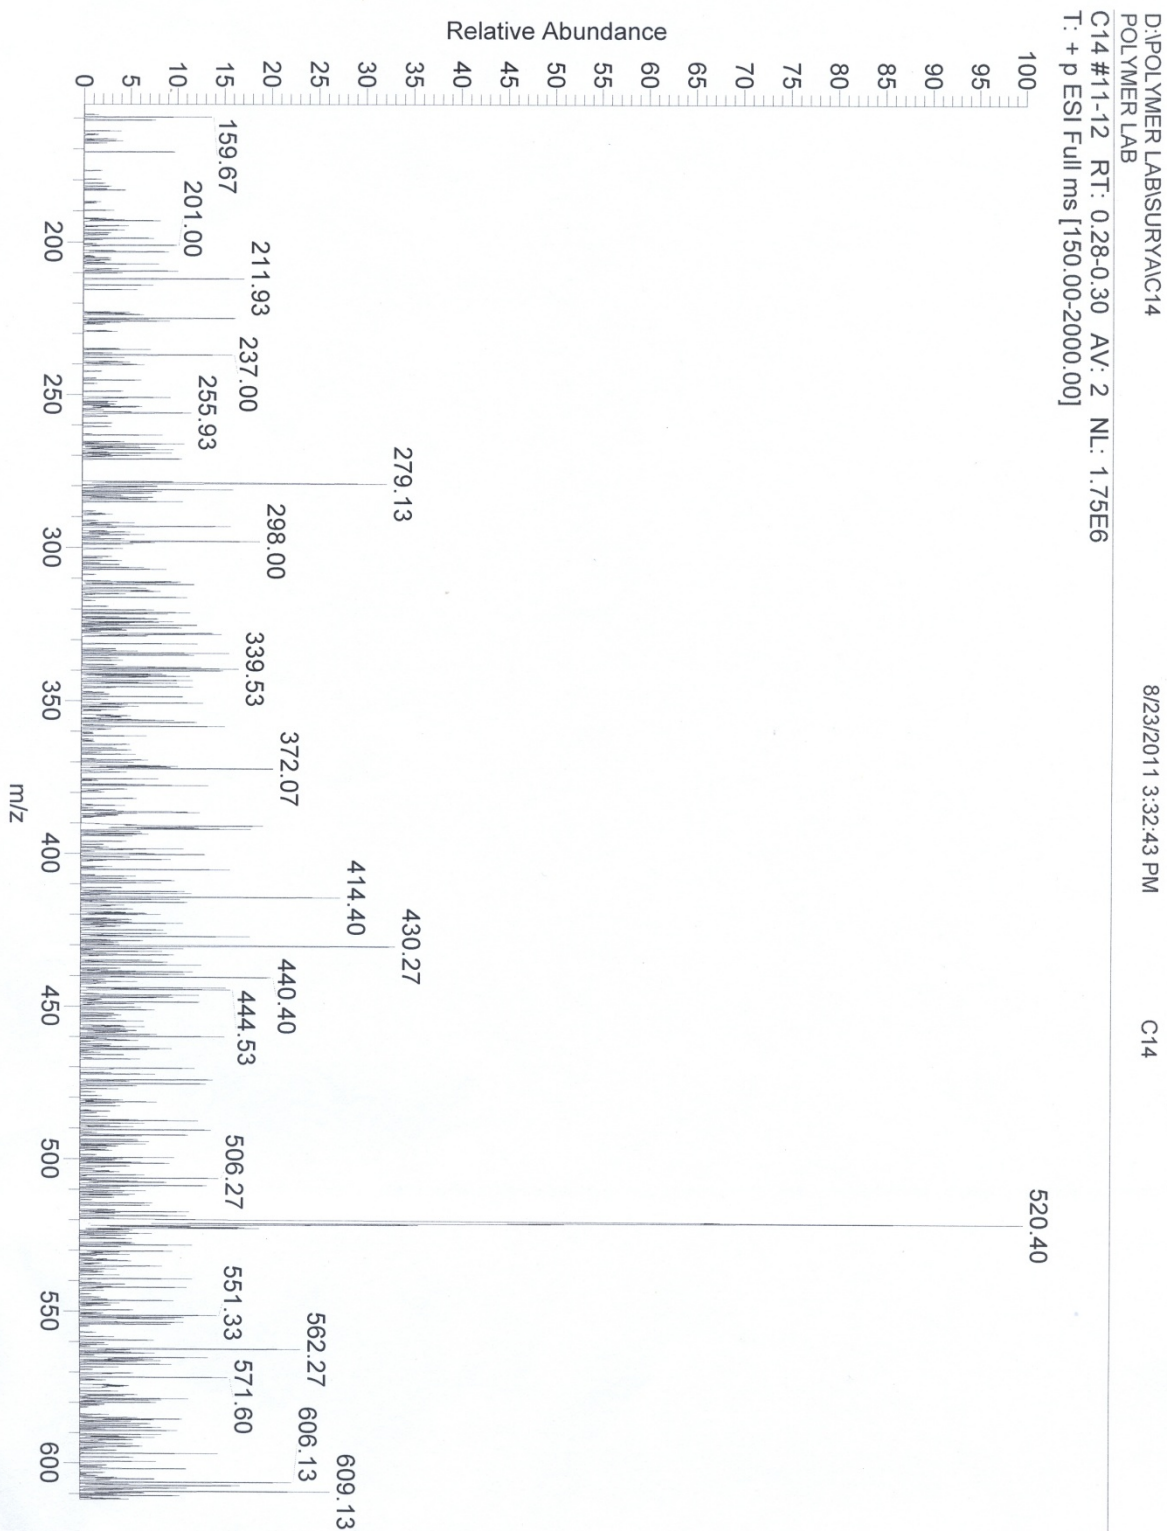



## BPTC

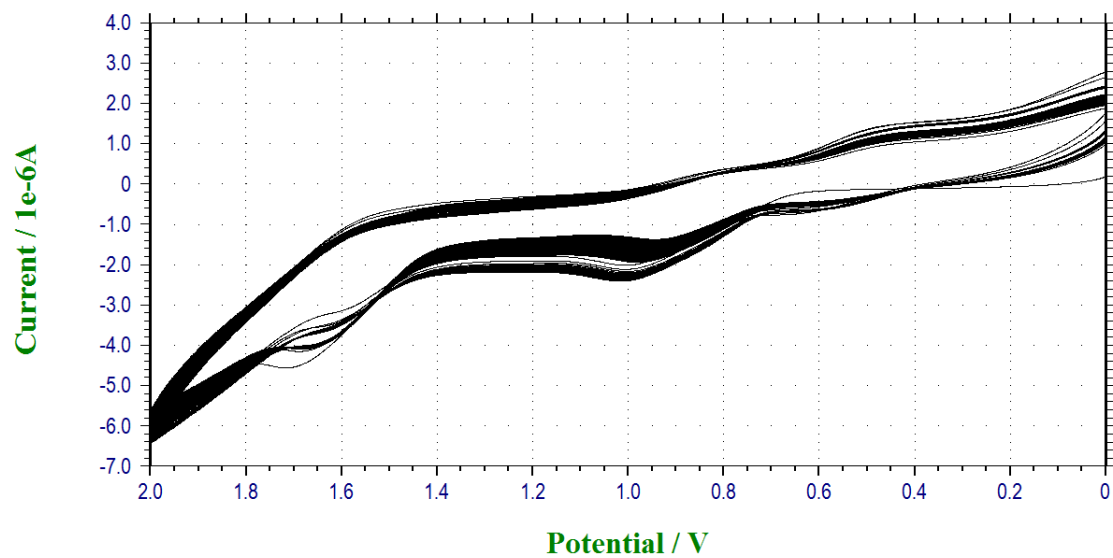

## HPTC

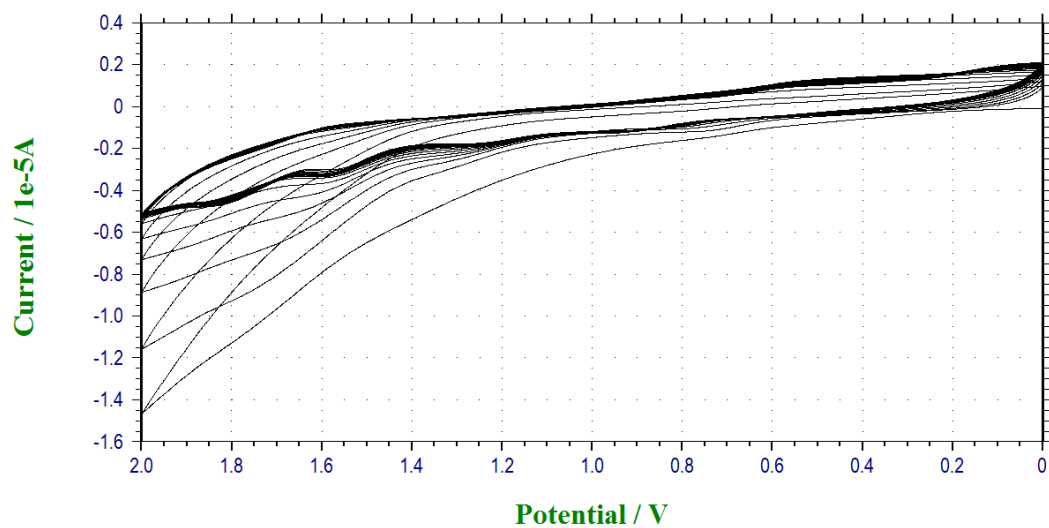

## OPTC

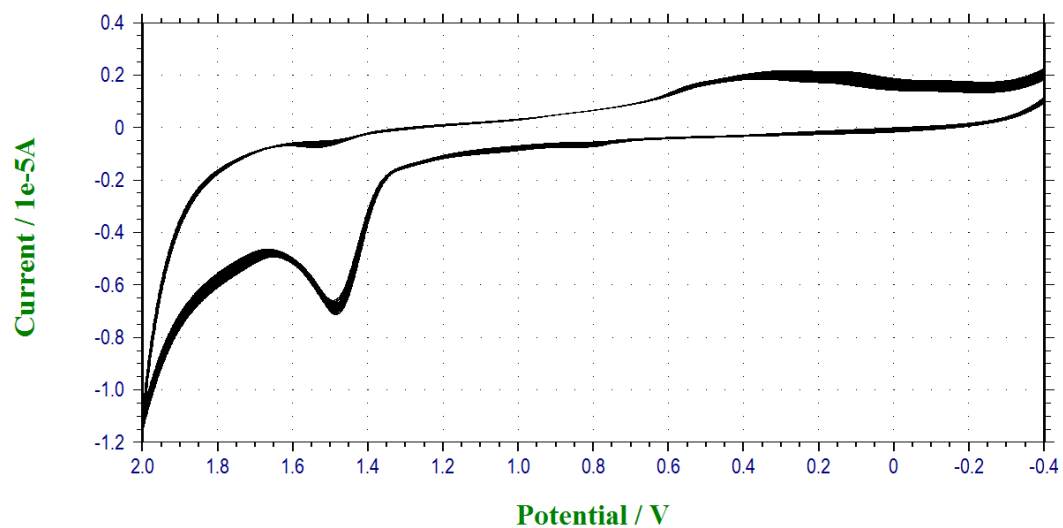

## DDPTC

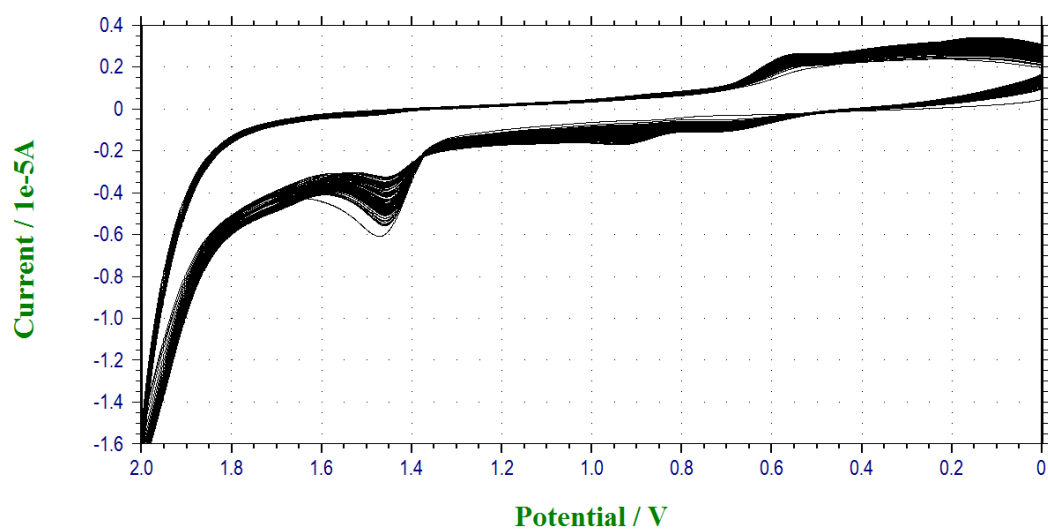

## SEM images.

### PHPTC

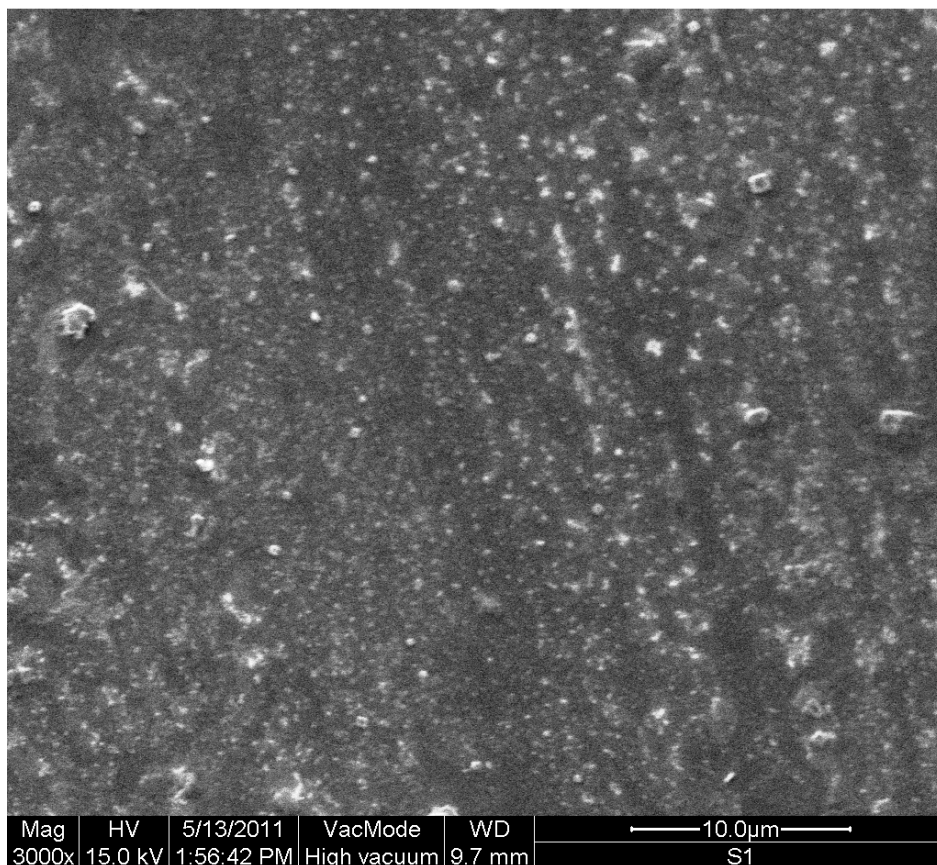

### POPTC

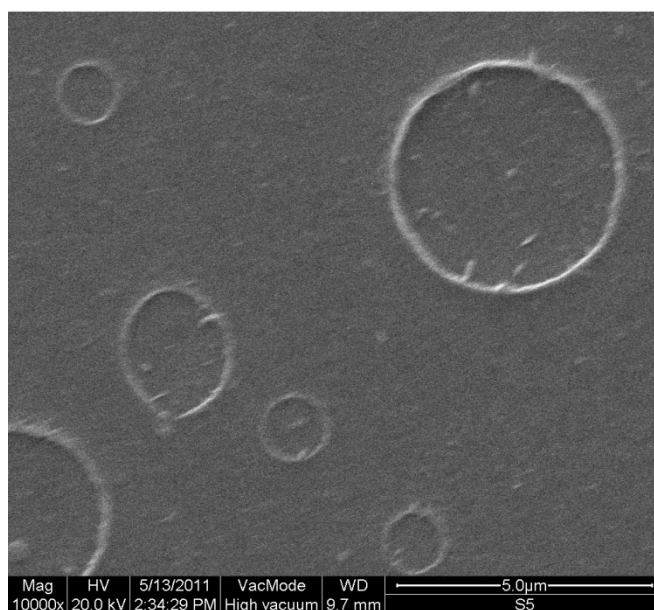



# PTDPTC

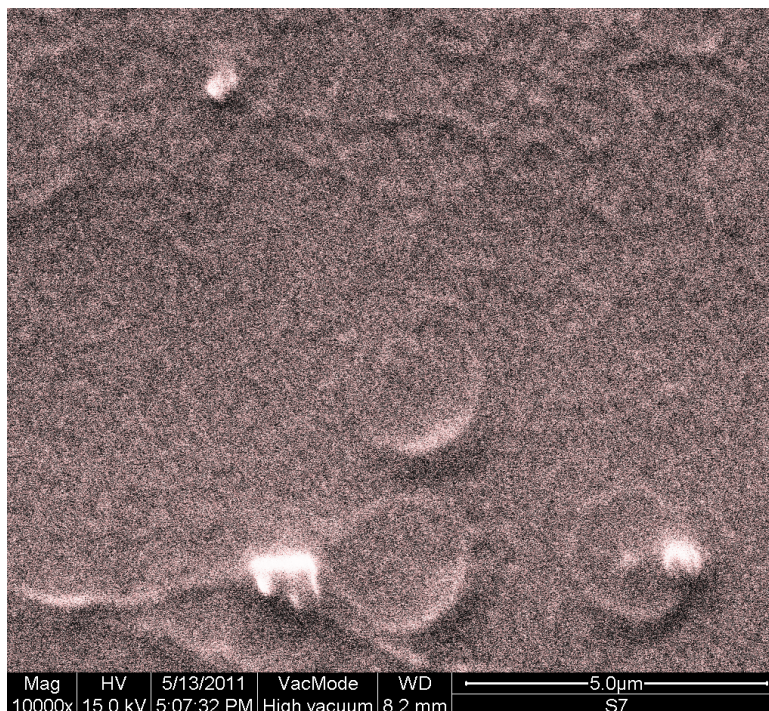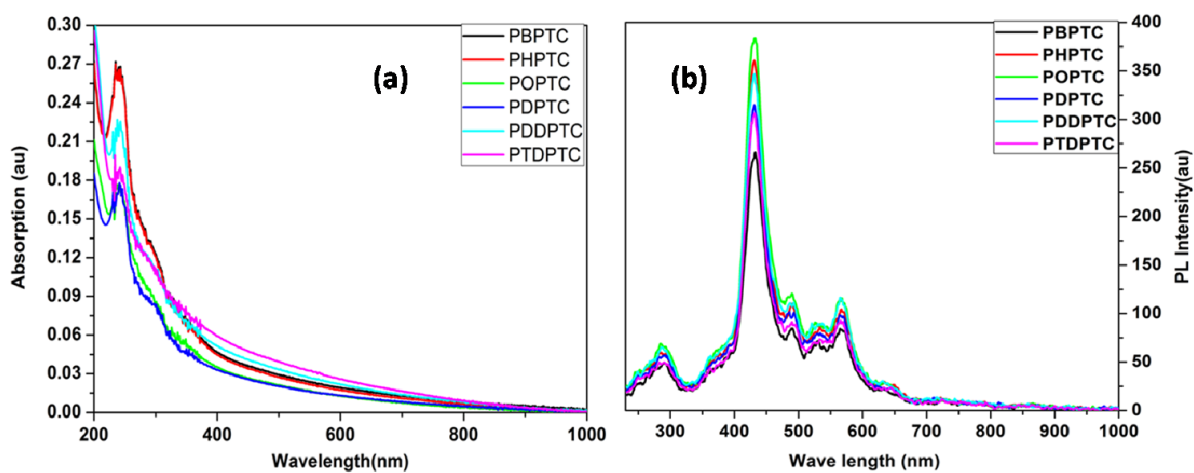

(a) Absorption and (b) Fluorescence spectra of thinfilms of all polymers

## Excitation polarisation.

### PBPTC

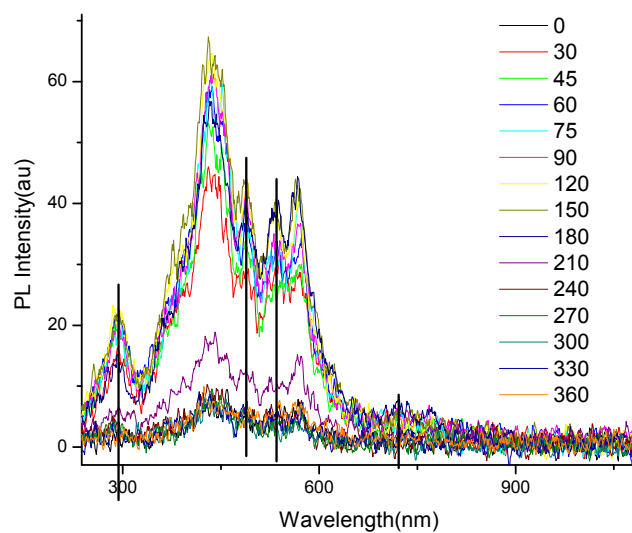

### PDPTC

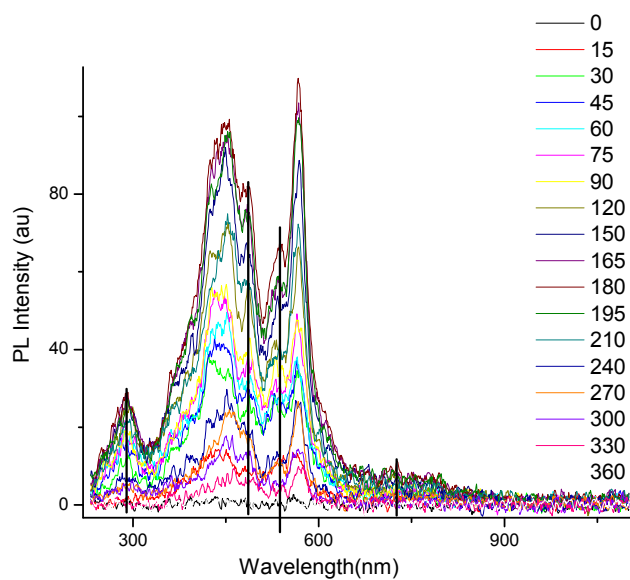

## PDDPTC

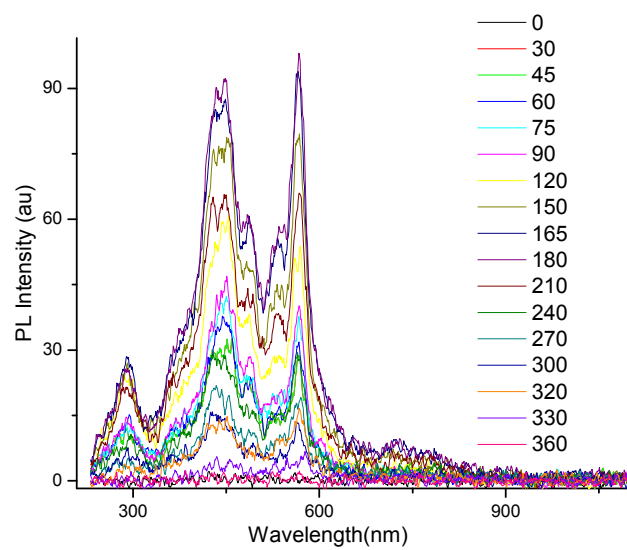

## PTDPTC

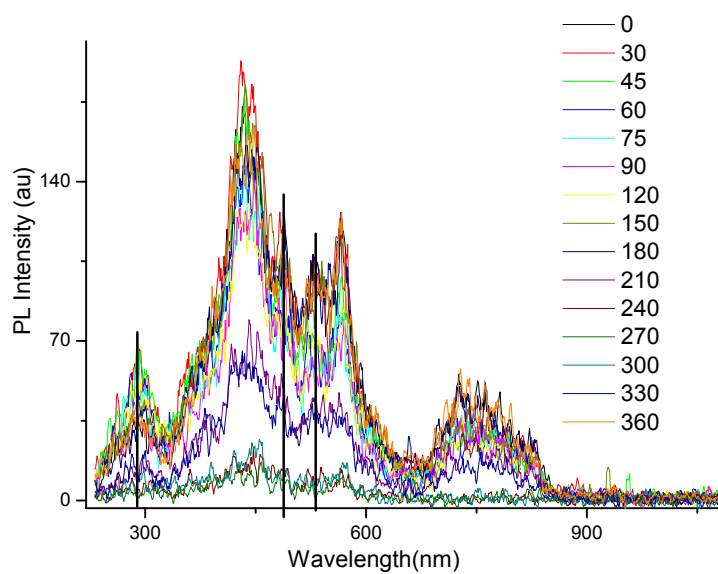

**Table S1(a)** Fluorescence anisotropy data for solution.

$$r = (I_{VV} - G * I_{VH}) / (I_{VV} + 2 * G * I_{VH}); G = I_{HV} / I_{HH}$$

| Sample code | Monomer | Polymer |
|-------------|---------|---------|
| BPTC        | 0.012   | 0.05    |
| HPTC        | 0.013   | 0.06    |
| OPTC        | 0.015   | 0.16    |
| DPPTC       | 0.011   | 0.11    |
| DDPTC       | 0.009   | 0.07    |
| TDPTC       | 0.010   | 0.10    |

**Table S1(b)** Linear dichroism data.

$$D = (I_x - I_y) / (I_x + I_y)^{19}$$

| Sample code | LD values at various UV ranges in thin film |      |      |      |
|-------------|---------------------------------------------|------|------|------|
|             | 336                                         | 280  | 233  | 212  |
| PBPTC       | 0.11                                        | 0.17 | 0.11 | 0.15 |
| PHPTC       | 0.17                                        | 0.15 | 0.26 | 0.18 |
| POPTC       | 0.18                                        | 0.41 | 0.23 | 0.30 |
| PDPTC       | 0.11                                        | 0.23 | 0.14 | 0.27 |
| PDDPTC      | 0.10                                        | 0.20 | 0.07 | 0.18 |
| PTDPTC      | 0.18                                        | 0.38 | 0.10 | 0.22 |

## Elemental analysis (%)

**4-((E)-[(4 – butyloxy Phenyl) imino] methyl} phenyl thiophene 3- Carboxylate}**

**C: 70.20, H:5.70, N: 3.80, O:12.10, S: 8.35 ( Cal. C: 69.65, H:5.58, N: 3.69, O:12.66, S: 8.44)**

**4-((E)-[(4 – Octyloxy Phenyl) imino] methyl} phenyl thiophene 3- Carboxylate}**

**C: 71.80, H:6.82, N: 3.62, O: 10.80, S: 7.25 ( Cal. 71.72, H: 6.67, N: 3.22, O: 11.03, S: 7.35)**

**4-((E)-[(4 – decyloxy Phenyl) imino] methyl} phenyl thiophene 3- Carboxylate}**

**C: 72.19, H: 6.93, N: 3.32, O: 10.89, S: 6.80 ( Cal. C: 72.57, H: 7.13, N: 3.02, O:10.37, S: 6.91)**

**4-((E)-[(4 – dodecyloxy Phenyl) imino] methyl} phenyl thiophene 3- Carboxylate}**

**C: 73.09, H: 7.38, N: 2.99, O:9.95, S: 6.58 ( Cal. C: 73.32, H: 7.53, N: 2.85, O:9.77, S: 6.52)**

**4-((E)-[(4 – tetradecyloxy Phenyl) imino] methyl} phenyl thiophene 3- Carboxylate}**

**C: 74.19, H: 7.50, N:2.55, O:10.15, S: 6.07 ( Cal. C:73.99, H. 7.90, N:2.70, O:9.25, S: 6.17)**
